# Supplementary material for: Triptolide, a HSP90 middle domain inhibitor, induces apoptosis in triple manner
Source: PubMed Central journal article supplement (PMC5976465; doi:10.18632/oncotarget.24737), 2018-04-27
Supplement: oncotarget-09-22301-s001.pdf [file oncotarget-09-22301-s001.pdf]

## Triptolide, a HSP90 middle domain inhibitor, induces apoptosis in triple manner

### SUPPLEMENTARY MATERIALS

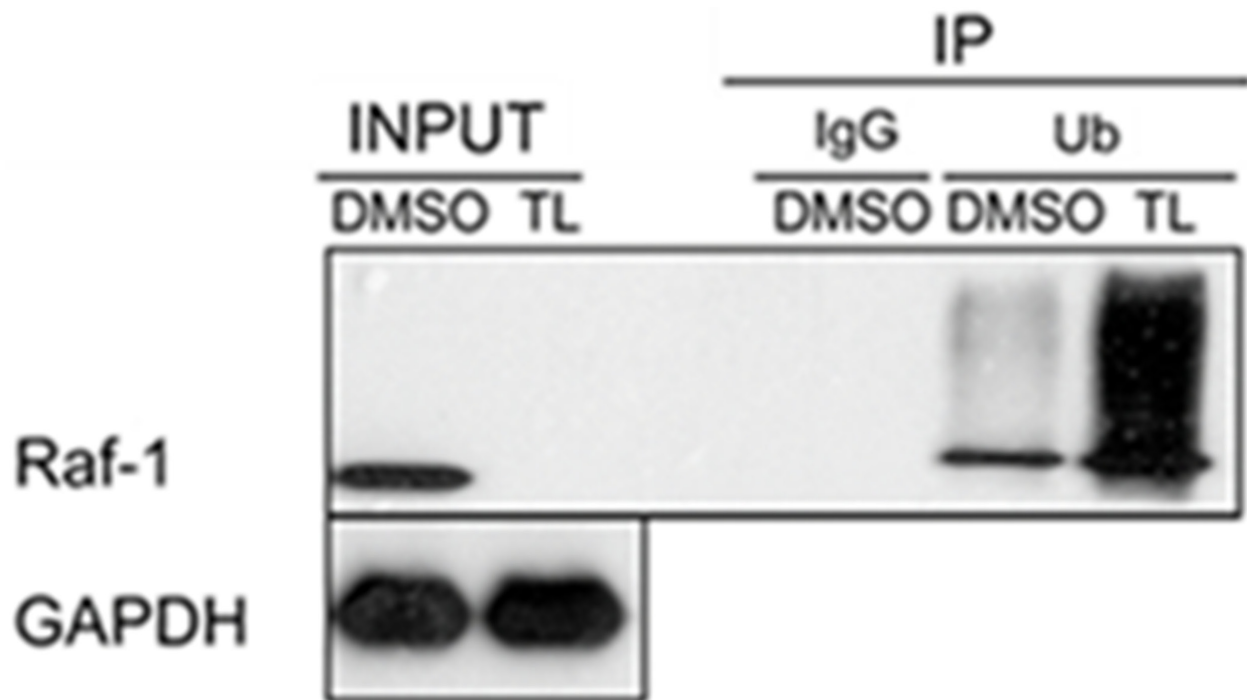

**Supplementary Figure 1: TL treatment leads to degradation of specific HSP90 $\beta$  client protein Raf-1 through ubiquitination pathway.** Immunoprecipitation of ubiquitinated proteins by anti-Ub antibodies and immunoblotted with Raf-1 antibodies.

**A**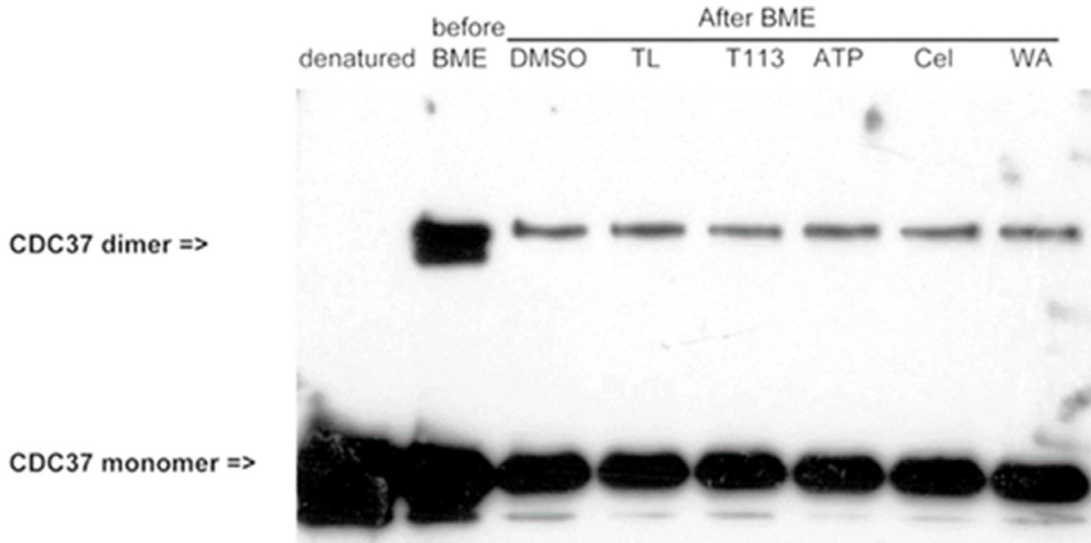**B**

Time course:

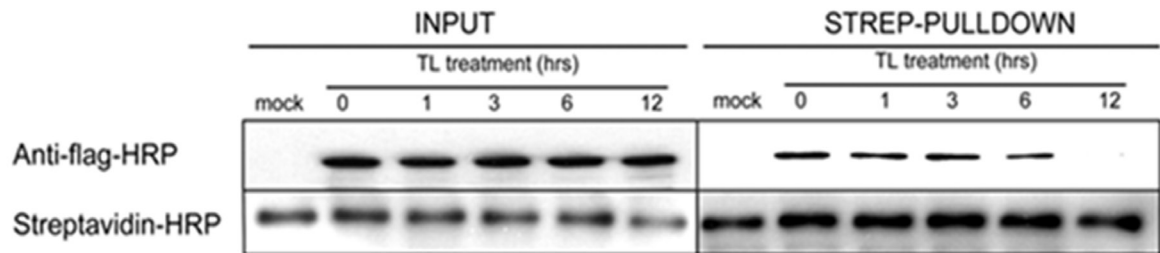

Dosage:

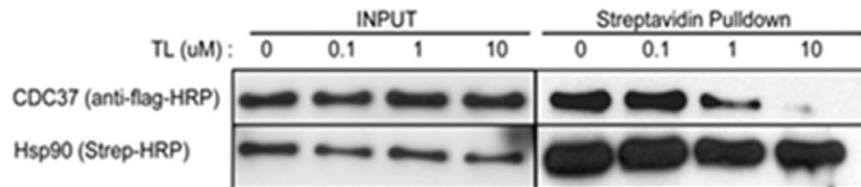

**Supplementary Figure 2:** (A) Non-reducing SDS-PAGE of dimeric status of CDC37 in HeLa cells upon treatment of TL and different inhibitors. (B) Co-immunoprecipitation assay on Hsp90 $\beta$  and CDC37 interaction upon treatment of TL for different time-points (time-dependent study, upper) and TL in different concentrations for 6 hrs (dosage-dependent study, lower).
